# Supplementary material for: Effect of inhibition of CBP-coactivated β-catenin-mediated Wnt signalling in uremic rats with vascular calcifications
Source: PubMed Central journal article supplement (PMC6075782; doi:10.1371/journal.pone.0201936), 2018-08-03
Supplement: pone.0201936.s001.pdf [file pone.0201936.s001.pdf]

| GENE                    | NAME                                                  | Ctrl (rpkm) | Uremic (rpkm) | Log2(Uremic/Ctrl) | P      |
|-------------------------|-------------------------------------------------------|-------------|---------------|-------------------|--------|
| <b>WNT LIGANDS</b>      |                                                       |             |               |                   |        |
| <b>Wnt16</b>            | wingless-type MMTV integration site family, member 16 | 0.5         | 4.2           | 3.2               | 0.0048 |
| <b>Wnt5b</b>            | wingless-type MMTV integration site family, member 5B | 7.1         | 2.1           | -1.7              | 0.0017 |
| <b>WNT SIGNALING</b>    |                                                       |             |               |                   |        |
| <b>Fzd2</b>             | frizzled family receptor 2                            | 35          | 23            | -0.6              | 0,0064 |
| <b>Fzd1</b>             | frizzled family receptor 1                            | 9.1         | 19            | 1.0               | 0,0007 |
| <b>Fzd4</b>             | frizzled family receptor 4                            | 24          | 16            | -0.5              | 0,02   |
| <b>Dvl1</b>             | dishevelled segment polarity protein 1                | 37          | 27            | -0.5              | 0.04   |
| <b>WNT TARGET GENES</b> |                                                       |             |               |                   |        |
| <b>Jun</b>              | jun proto-oncogene                                    | 216         | 66            | -1.7              | 0,0007 |
| <b>Ccnd1</b>            | cyclin D1                                             | 21          | 86            | 2.1               | 0,0007 |
| <b>Myc</b>              | myc proto-oncogene                                    | 9.5         | 20            | 1.1               | 0,0007 |
| <b>Snail</b>            | snail1                                                | 17          | 53            | 1.6               | 0,0007 |
| <b b="" fn1<=""></b>    | fibronectin 1                                         | 192         | 3778          | 4.3               | 0,0007 |
| <b>Bmp4</b>             | bone morphogenetic protein 4                          | 40          | 80            | 1.0               | 0,0007 |
| <b>Runx2</b>            | runt-related transcription factor 2                   | 1.3         | 6.0           | 2.2               | 0,0007 |
| <b>Fst</b>              | folistatin                                            | 3.8         | 13            | 1.8               | 0,0007 |
| <b>Grem1</b>            | gremlin 1                                             | 1.4         | 5.5           | 2.0               | 0,0007 |
| <b>Grem2</b>            | gremlin 2                                             | 12          | 2.8           | -2.0              | 0,0007 |
| <b>Postn</b>            | periostin                                             | 87          | 810           | 3.2               | 0,0007 |
| <b>WNT INHIBITORS</b>   |                                                       |             |               |                   |        |
| <b>Sost</b>             | sclerostin                                            | 12          | 139           | 3.6               | 0,0007 |
| <b>Sfrp4</b>            | secreted frizzled-related protein 4                   | 17          | 39            | 1.2               | 0,0007 |
| <b>Frzb</b>             | frizzled-related protein                              | 806         | 442           | -0.9              | 0.003  |
